# Supplementary material for: Enterobacterales Infection after Intestinal Dominance in Hospitalized Patients
Source: PubMed Central journal article supplement (PMC7376504; doi:10.1128/msphere.00450-20), 2020-07-22

A

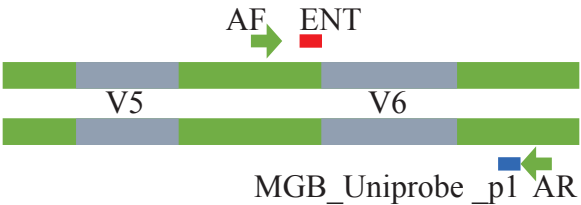

B

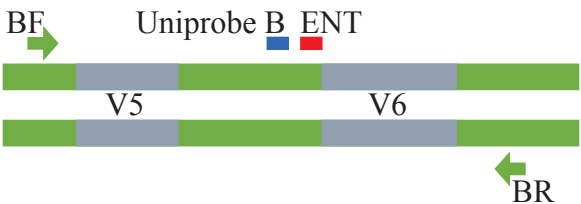

Supplement: mSphere.00450-20-sf001.pdf [file mSphere.00450-20-sf001.pdf]
